# Supplementary material for: Clinical Characteristics and Disease Course of Fibrosing Interstitial Lung Disease Patients in a Real-World Setting
Source: MDPI journal article supplement (doi:10.3390/medicina59020281), 2023-01-31
Supplement: s1 [file s1]

## Supplementary Material

### ILD diagnoses

| ILD diagnoses                                          | ICD                                                                                     |
|--------------------------------------------------------|-----------------------------------------------------------------------------------------|
| NSIP (non-specific interstitial pneumonia)             | J84.0, J84.1, J84.8, J84.9                                                              |
| Unclassifiable IIP (idiopathic interstitial pneumonia) | J84.0, J84.1, J84.8, J84.9                                                              |
| HP (hypersensitivity pneumonitis)                      | J67.*                                                                                   |
| Exposure-related ILD                                   | J60, J61, J62, J63.*, J64                                                               |
| Sarcoidosis                                            | D86.0, D86.2                                                                            |
| RA-ILD (rheumatoid arthritis associated ILD)           | J99.0*M05.1 / M05.1*J99.0, M45, M05.0, M05.1, M05.8, M05.9, M06.* + J84.1, J84.8, J84.9 |
| SSc-ILD (systemic sclerosis-associated ILD)            | M34.0, M34.1, M34.8, M34.9 + J84.1, J84.8, J84.9                                        |
| Mixed CTD (connective tissue disease)                  | M35.1                                                                                   |
| Other diffuse CTD                                      | M32.* + J84.*, M33.0 + J84.*, M33.1 + J84.*, M33.9 + J84.*, M33.2 + J84.*, M35.0        |
| IPF                                                    | J84.0, J84.1, J84.8, J84.9                                                              |

### Comorbidities

#### Diabetes

|                             |                    |
|-----------------------------|--------------------|
| E10.x (x = 1,2,5,6,7,9)     | juvenile diabetes  |
| E11.x (x = 1,2,3,5,6,7,8,9) | adult diabetes     |
| E14.9                       | undefined diabetes |

#### Obesity

|                     |         |
|---------------------|---------|
| E66.x (x = 0,2,8,9) | obesity |
|---------------------|---------|

#### Sleep apnea

|       |             |
|-------|-------------|
| G47.3 | sleep apnea |
|-------|-------------|

#### Cardiovascular diseases

|       |                                               |
|-------|-----------------------------------------------|
| I11.x | hypertension                                  |
| I12.x | renal insufficiency related to hypertension   |
| I13.x | hypertensive heart and chronic kidney disease |
| I15.x | hypertension related renal insufficiency      |

|                                    |                             |
|------------------------------------|-----------------------------|
| I20.x                              | angina pectoris             |
| I21.x                              | myocardial infarction       |
| I22.x                              | myocardial infarction       |
| I24.x                              | ischemic heart disease      |
| I25.x                              | ischemia                    |
| I63.x                              | stroke                      |
| G46.x                              | cerebral palsy              |
| Renal insufficiency                |                             |
| N17.x                              | renal insufficiency         |
| N18.x                              | renal insufficiency         |
| Chronic lower respiratory diseases |                             |
| J43.9                              | lung emphysema              |
| J44.x                              | COPD                        |
| J45.x                              | asthma                      |
| J46                                | acute severe asthma         |
| Malignant diseases                 |                             |
| C00-C97 (Cx)                       | malignant diseases (cancer) |
| Mood and other anxiety disorders   |                             |
| F30.                               | manic disorder              |
| F31.                               | bipolar disorder            |
| F32., F33.,                        | depression                  |
| F34., F38.                         | mood disorders              |
| F41.x                              | other anxiety disorders     |

### ATC codes of medications

#### Immunosuppressants

|              |         |
|--------------|---------|
| azathioprine | L04AX01 |
| methotrexate | L04AX03 |
|              | L01BA01 |

#### TNF-alpha inhibitors

|              |         |
|--------------|---------|
| etanercept   | L04AB01 |
| infliximab   | L04AB02 |
| adalimumab   | L04AB04 |
| sertolimumab | L04AB05 |

|                                  |                               |
|----------------------------------|-------------------------------|
| golimumab                        | L04AB06                       |
| selective immunosuppressants     |                               |
| abatasept                        | L04AA24                       |
| apremilast                       | L04AA32                       |
| leflunomid                       | L04AA13                       |
| JAK inhibitors                   | L04AA29<br>L04AA37<br>L04AA44 |
| mycophenolate                    | L04AA06                       |
| IL-6 inhibitors                  |                               |
| tosililtzumab                    | L04AC07                       |
| IL-1 -blocker<br>anakinra        | L04AC03                       |
| aurothiomalate                   | M01CB01                       |
| chlorocine<br>hhydroxychlorocine | P01BA01                       |
| B cell inhibitor                 |                               |
| rituximab                        | L01XC02                       |
| glucocorticoids                  |                               |
| dexamethasone                    | H02AB02                       |
| methylprednisolon                | H02AB04                       |
| prednisolon                      | H02AB06                       |
| sulfasalazine                    | A07E01                        |

### **Codes for acute hospitalizations**

A40.3, A40.8, A41.0, A41.1, A41.5, A41.8, A41.9, A49.9, B34.0, B59+, D86.0, D86.2, D86.8, D86.8+I41.8, D86.8+N16.2, D86.9, J10.0, J11.0, J12.1, J12.8, J13, J15.9, J18.9, J20.9, J21.0, J22, J32.0, J32.9, J47, J61, J62.8, J63.3, J67.9, J69.0, J69.8, J80, J82, J84.1, J84.8, J84.9, J92.0, J92.9, J93.1, J93.9, J94.8, J96.0, J96.1, J98.0, R04.2, R04.9, R05, R06.0, R06.2

## Regular expressions used to extract 6MWT and lowest SpO2

```
library(RtoolsKTP)
```

```
library(stringr)
```

```
## 6 MIN WALKING TEST ##
```

```
sentence_data <- extract_sentences_from_text(text_data$TEXT, horizontal = F)
```

```
sentence_data_sub <- sentence_data[grepl("6 min|teoreettisesta etä", sentences)]
```

```
# % FROM THEORETICAL DISTANCE
```

```
sentence_data_sub[, REL_DIST := str_extract(str_extract(sentences, "(\\d+[.,]?\\d*)\\s?\\%\\s?"),
"\\d+[.,]?\\d*"))]
```

```
# LOWEST SpO2
```

```
sentence_data_sub_spo2 <- sentence_data[grepl("alim", sentences)]
```

```
sentence_data_sub_spo2[, MIN_SPO2 := str_extract(str_extract(sentences,
"(?<=alimmillaan|alimillaan|alimilleen|alimmilleen).*(\\d+[.,]?\\d*)\\s?\\%\\s?"), "\\d+[.,]?\\d*")]
```

## Fibrosis status during the follow-up years 1-5

| Patient Group   | 1              |                |                  |                    | 2              |                |                  |                   | 3             |                |                  |                   |
|-----------------|----------------|----------------|------------------|--------------------|----------------|----------------|------------------|-------------------|---------------|----------------|------------------|-------------------|
|                 | IPF<br>(N=110) | PPF<br>(N=142) | F-ILD<br>(N=194) | F-ILD-U<br>(N=138) | IPF<br>(N=101) | PPF<br>(N=142) | F-ILD<br>(N=192) | F-ILD-U<br>(N=89) | IPF<br>(N=79) | PPF<br>(N=130) | F-ILD<br>(N=186) | F-ILD-U<br>(N=59) |
| Fibrosis status |                |                |                  |                    |                |                |                  |                   |               |                |                  |                   |
| Increased       | 24 (21.8 %)    | 10 (7.0 %)     | 3 (1.5 %)        | 2 (1.4 %)          | 18 (17.8 %)    | 11 (7.7 %)     | 3 (1.6 %)        | 3 (3.4 %)         | 15 (19.0 %)   | 3 (2.3 %)      | 5 (2.7 %)        | 1 (1.7 %)         |
| Decreased       | 0 (0.0 %)      | 0 (0.0 %)      | 2 (1.0 %)        | 0 (0.0 %)          | 0 (0.0 %)      | 0 (0.0 %)      | 3 (1.6 %)        | 0 (0.0 %)         | 0 (0.0 %)     | 0 (0.0 %)      | 1 (0.5 %)        | 1 (1.7 %)         |
| Missing         | 86 (78.2%)     | 132 (93.0%)    | 189 (97.4%)      | 136 (98.6%)        | 83 (82.2%)     | 131 (92.3%)    | 186 (96.9%)      | 86 (96.6%)        | 64 (81.0%)    | 127 (97.7%)    | 180 (96.8%)      | 57 (96.6%)        |

  

| Patient Group   | 4             |                |                  |                   | 5             |               |                  |                   |
|-----------------|---------------|----------------|------------------|-------------------|---------------|---------------|------------------|-------------------|
|                 | IPF<br>(N=49) | PPF<br>(N=114) | F-ILD<br>(N=154) | F-ILD-U<br>(N=34) | IPF<br>(N=31) | PPF<br>(N=85) | F-ILD<br>(N=114) | F-ILD-U<br>(N=16) |
| Fibrosis status |               |                |                  |                   |               |               |                  |                   |
| Increased       | 8 (16.3 %)    | 4 (3.5 %)      | 4 (2.6 %)        | 0 (0.0 %)         | 2 (6.5 %)     | 4 (4.7 %)     | 4 (3.5 %)        | 0 (0.0 %)         |
| Decreased       | 0 (0.0 %)     | 0 (0.0 %)      | 1 (0.6 %)        | 0 (0.0 %)         | 0 (0.0 %)     | 0 (0.0 %)     | 0 (0.0 %)        | 0 (0.0 %)         |
| Missing         | 41 (83.7%)    | 110 (96.5%)    | 149 (96.8%)      | 34 (100%)         | 29 (93.5%)    | 81 (95.3%)    | 110 (96.5%)      | 16 (100%)         |

## Lung function during the follow-up years 1-5

| Patient Group   | 1                 |                   |                   | 2                 |                   |                   | 3                 |                   |                   |
|-----------------|-------------------|-------------------|-------------------|-------------------|-------------------|-------------------|-------------------|-------------------|-------------------|
|                 | IPF<br>(N=63)     | PPF<br>(N=128)    | F-ILD<br>(N=134)  | IPF<br>(N=52)     | PPF<br>(N=104)    | F-ILD<br>(N=98)   | IPF<br>(N=18)     | PPF<br>(N=41)     | F-ILD<br>(N=49)   |
| FVC % predicted |                   |                   |                   |                   |                   |                   |                   |                   |                   |
| Median (Q1, Q3) | 78.4 (67.2, 88.2) | 71.6 (57.2, 85.9) | 82.5 (69.3, 92.5) | 77.2 (64.5, 87.8) | 72.0 (60.6, 88.3) | 80.3 (72.1, 91.6) | 65.5 (59.9, 82.5) | 69.8 (52.8, 75.3) | 88.1 (77.0, 99.3) |
| Min - Max       | 38.9 - 127        | 30.8 - 136        | 36.7 - 157        | 44.0 - 121        | 30.2 - 113        | 43.4 - 131        | 39.0 - 103        | 28.3 - 101        | 46.5 - 149        |

  

| Patient Group   | 4                 |                   |                   | 5                |                   |                   |
|-----------------|-------------------|-------------------|-------------------|------------------|-------------------|-------------------|
|                 | IPF<br>(N=12)     | PPF<br>(N=26)     | F-ILD<br>(N=46)   | IPF<br>(N=20)    | PPF<br>(N=40)     | F-ILD<br>(N=46)   |
| FVC % predicted |                   |                   |                   |                  |                   |                   |
| Median (Q1, Q3) | 75.3 (50.5, 84.2) | 78.1 (56.1, 96.1) | 81.3 (66.1, 98.2) | 76.3 (62.5, 101) | 77.4 (62.4, 84.1) | 80.5 (69.8, 94.6) |
| Min - Max       | 36.4 - 113        | 15.4 - 116        | 40.0 - 139        | 49.3 - 123       | 45.0 - 113        | 38.5 - 150        |

  

| Patient Group    | 1                 |                   |                   |                   | 2                 |                   |                   |                   |
|------------------|-------------------|-------------------|-------------------|-------------------|-------------------|-------------------|-------------------|-------------------|
|                  | IPF<br>(N=67)     | PPF<br>(N=80)     | F-ILD<br>(N=104)  | F-ILD-U<br>(N=25) | IPF<br>(N=59)     | PPF<br>(N=68)     | F-ILD<br>(N=92)   | F-ILD-U<br>(N=22) |
| DLCO % predicted |                   |                   |                   |                   |                   |                   |                   |                   |
| Median (Q1, Q3)  | 53.8 (42.6, 59.9) | 53.0 (42.6, 62.1) | 63.2 (52.4, 77.6) | 67.6 (50.4, 74.0) | 52.1 (40.5, 60.6) | 52.8 (43.4, 61.8) | 61.6 (50.4, 73.8) | 72.5 (61.4, 78.5) |
| Min - Max        | 23.4 - 93.6       | 22.5 - 87.9       | 24.5 - 102        | 32.5 - 82.9       | 25.7 - 96.8       | 25.5 - 103        | 23.8 - 114        | 44.9 - 89.0       |

| 3                |                   |                   |                   |                   |                   |                   |                   |                   |                   |                   |                   |
|------------------|-------------------|-------------------|-------------------|-------------------|-------------------|-------------------|-------------------|-------------------|-------------------|-------------------|-------------------|
| Patient Group    | IPF<br>(N=34)     | PPF<br>(N=55)     | F-ILD<br>(N=73)   | F-ILD-U<br>(N=5)  | IPF<br>(N=23)     | PPF<br>(N=36)     | F-ILD<br>(N=49)   | F-ILD-U<br>(N=2)  | IPF<br>(N=15)     | PPF<br>(N=25)     | F-ILD<br>(N=28)   |
| DLCO % predicted |                   |                   |                   |                   |                   |                   |                   |                   |                   |                   |                   |
| Median (Q1, Q3)  | 51.2 (42.9, 65.2) | 54.7 (45.2, 68.0) | 61.7 (48.1, 75.3) | 54.5 (50.4, 72.9) | 49.8 (43.0, 61.8) | 56.5 (47.1, 64.2) | 59.1 (51.9, 77.6) | 55.1 (46.1, 64.0) | 54.1 (45.3, 65.2) | 51.7 (41.0, 67.0) | 70.0 (54.6, 82.0) |
| Min - Max        | 22.1 - 140        | 13.5 - 99.6       | 20.0 - 106        | 43.1 - 80.3       | 28.2 - 77.3       | 29.3 - 89.6       | 26.1 - 115        | 37.2 - 72.9       | 13.3 - 69.2       | 20.9 - 89.4       | 39.7 - 96.5       |

| 1               |                   |                   |                   |                   |                   |                   |                   | 2                 |  |  |  |
|-----------------|-------------------|-------------------|-------------------|-------------------|-------------------|-------------------|-------------------|-------------------|--|--|--|
| Patient Group   | IPF<br>(N=67)     | PPF<br>(N=80)     | F-ILD<br>(N=104)  | F-ILD-U<br>(N=25) | IPF<br>(N=59)     | PPF<br>(N=68)     | F-ILD<br>(N=92)   | F-ILD-U<br>(N=22) |  |  |  |
| TLC % predicted |                   |                   |                   |                   |                   |                   |                   |                   |  |  |  |
| Median (Q1, Q3) | 69.5 (62.4, 81.8) | 70.8 (61.0, 83.4) | 78.8 (69.9, 88.8) | 81.0 (73.5, 85.3) | 70.9 (63.8, 79.2) | 71.4 (62.3, 83.8) | 78.5 (68.4, 89.6) | 83.8 (76.1, 86.0) |  |  |  |
| Min - Max       | 47.2 - 103        | 41.0 - 101        | 46.2 - 120        | 43.8 - 125        | 50.8 - 110        | 42.1 - 112        | 47.5 - 119        | 65.2 - 99.8       |  |  |  |

| 3               |                   |                   |                   |                   |                   |                   |                   |                   |                   |                   |                   |
|-----------------|-------------------|-------------------|-------------------|-------------------|-------------------|-------------------|-------------------|-------------------|-------------------|-------------------|-------------------|
| Patient Group   | IPF<br>(N=34)     | PPF<br>(N=55)     | F-ILD<br>(N=73)   | F-ILD-U<br>(N=5)  | IPF<br>(N=23)     | PPF<br>(N=36)     | F-ILD<br>(N=49)   | F-ILD-U<br>(N=2)  | IPF<br>(N=15)     | PPF<br>(N=25)     | F-ILD<br>(N=28)   |
| TLC % predicted |                   |                   |                   |                   |                   |                   |                   |                   |                   |                   |                   |
| Median (Q1, Q3) | 70.5 (61.9, 79.1) | 75.5 (64.0, 84.8) | 82.0 (69.9, 92.3) | 85.4 (75.8, 86.6) | 70.7 (60.3, 78.5) | 72.6 (62.4, 80.6) | 78.6 (66.5, 91.8) | 81.7 (78.7, 84.8) | 71.9 (61.8, 82.5) | 66.4 (55.7, 74.8) | 80.8 (75.0, 90.4) |
| Min - Max       | 46.9 - 175        | 36.1 - 162        | 47.9 - 127        | 64.5 - 89.8       | 49.2 - 99.0       | 49.2 - 101        | 47.2 - 119        | 75.6 - 87.8       | 53.6 - 98.1       | 45.0 - 99.3       | 49.4 - 123        |

## BMI during the follow-up years 1-5

| 1                     |                   |                   |                   |                    |                   |                   |                   | 2                 |  |  |  |
|-----------------------|-------------------|-------------------|-------------------|--------------------|-------------------|-------------------|-------------------|-------------------|--|--|--|
| Patient Group         | IPF<br>(N=110)    | PPF<br>(N=142)    | F-ILD<br>(N=194)  | F-ILD-U<br>(N=138) | IPF<br>(N=101)    | PPF<br>(N=142)    | F-ILD<br>(N=192)  | F-ILD-U<br>(N=89) |  |  |  |
| Body mass index (BMI) |                   |                   |                   |                    |                   |                   |                   |                   |  |  |  |
| Mean (SD)             | 28.6 (5.49)       | 28.1 (5.09)       | 28.5 (5.29)       | 26.4 (5.79)        | 27.7 (4.57)       | 27.9 (4.99)       | 28.1 (4.68)       | 27.3 (5.48)       |  |  |  |
| Median (Q1, Q3)       | 27.2 (25.0, 32.0) | 27.9 (24.3, 31.1) | 28.0 (25.1, 30.8) | 25.7 (22.5, 29.5)  | 26.7 (24.5, 30.1) | 27.9 (24.0, 30.5) | 27.5 (25.4, 30.2) | 26.7 (23.4, 30.1) |  |  |  |
| Min - Max             | 19.7 - 53.9       | 18.7 - 43.4       | 19.6 - 45.2       | 14.7 - 39.7        | 19.9 - 38.0       | 18.0 - 43.8       | 18.4 - 44.1       | 19.1 - 42.4       |  |  |  |
| Missing               | 19 (17.3%)        | 10 (7.0%)         | 33 (17.0%)        | 84 (60.9%)         | 25 (24.8%)        | 28 (19.7%)        | 53 (27.6%)        | 47 (52.8%)        |  |  |  |

| 3                     |                   |                   |                   |                   |                   |                   |                   | 4                 |  |  |  |
|-----------------------|-------------------|-------------------|-------------------|-------------------|-------------------|-------------------|-------------------|-------------------|--|--|--|
| Patient Group         | IPF<br>(N=79)     | PPF<br>(N=130)    | F-ILD<br>(N=186)  | F-ILD-U<br>(N=59) | IPF<br>(N=49)     | PPF<br>(N=114)    | F-ILD<br>(N=154)  | F-ILD-U<br>(N=34) |  |  |  |
| Body mass index (BMI) |                   |                   |                   |                   |                   |                   |                   |                   |  |  |  |
| Mean (SD)             | 27.7 (4.49)       | 27.7 (5.04)       | 28.2 (5.27)       | 28.0 (6.40)       | 27.4 (4.91)       | 27.5 (5.31)       | 27.8 (5.56)       | 27.5 (6.34)       |  |  |  |
| Median (Q1, Q3)       | 26.6 (24.5, 29.7) | 27.2 (24.5, 30.4) | 27.8 (24.8, 30.9) | 27.5 (23.9, 32.7) | 26.0 (24.0, 30.5) | 26.6 (23.9, 29.8) | 27.6 (24.5, 30.2) | 26.8 (23.3, 32.0) |  |  |  |
| Min - Max             | 20.6 - 40.3       | 16.9 - 43.7       | 18.5 - 41.1       | 15.1 - 44.4       | 17.4 - 37.5       | 18.8 - 48.1       | 15.7 - 44.1       | 15.6 - 42.2       |  |  |  |
| Missing               | 25 (31.6%)        | 31 (23.8%)        | 67 (36.0%)        | 37 (62.7%)        | 14 (28.6%)        | 37 (32.5%)        | 50 (32.5%)        | 15 (44.1%)        |  |  |  |

| 5                     |                   |                   |                   |
|-----------------------|-------------------|-------------------|-------------------|
| Patient Group         | IPF<br>(N=31)     | PPF<br>(N=85)     | F-ILD<br>(N=114)  |
| Body mass index (BMI) |                   |                   |                   |
| Mean (SD)             | 27.0 (4.20)       | 26.9 (4.21)       | 27.8 (5.14)       |
| Median (Q1, Q3)       | 26.3 (24.3, 28.4) | 26.5 (24.3, 29.6) | 27.3 (24.8, 30.2) |
| Min - Max             | 19.4 - 36.8       | 17.2 - 39.6       | 17.8 - 39.5       |
| Missing               | 6 (19.4%)         | 28 (32.9%)        | 36 (31.6%)        |
